# Supplementary material for: SHIP-MR and Radiology: 12 Years of Whole-Body Magnetic Resonance Imaging in a Single Center
Source: MDPI journal article supplement (doi:10.3390/healthcare10010033), 2021-12-24

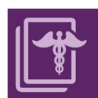

**Table S1.** Quality-based ranking of all published SHIP papers by Scimago Journal & Country Rank (SJR). Given is also the h-index.

| Journal                                                  | Quartil | SJR (2020) | h-index | Number of papers (n=105) |
|----------------------------------------------------------|---------|------------|---------|--------------------------|
| Gut                                                      | Q1      | 8.413      | 293     | 1                        |
| Gastroenterology                                         | Q1      | 7.828      | 402     | 1                        |
| Alzheimer's and Dementia                                 | Q1      | 6.713      | 118     | 1                        |
| Annals of the Rheumatic Diseases                         | Q1      | 6.333      | 240     | 2                        |
| Journal of Clinical Investigation                        | Q1      | 6.278      | 488     | 1                        |
| Brain                                                    | Q1      | 5.142      | 336     | 1                        |
| European Journal of Epidemiology                         | Q1      | 3.825      | 111     | 1                        |
| Plos Genetics                                            | Q1      | 3.587      | 233     | 1                        |
| Journal of Clinical Periodontology                       | Q1      | 3.456      | 151     | 2                        |
| Int J Epidemiol                                          | Q1      | 3.406      | 208     | 1                        |
| JAMA network open                                        | Q1      | 3.278      | 39      | 1                        |
| NeuroImage                                               | Q1      | 3.259      | 364     | 3                        |
| Radiology                                                | Q1      | 3.118      | 295     | 4                        |
| Neurology                                                | Q1      | 2.910      | 364     | 1                        |
| Neuropsychopharmacology                                  | Q1      | 2.704      | 219     | 1                        |
| Cardiovascular Diabetology                               | Q1      | 2.527      | 75      | 1                        |
| Journal of the American Heart Association                | Q1      | 2.494      | 85      | 1                        |
| Investigative Radiology                                  | Q1      | 2.330      | 114     | 1                        |
| Mayo Clinic Proceedings                                  | Q1      | 2.278      | 179     | 1                        |
| Sleep                                                    | Q1      | 2.222      | 207     | 1                        |
| Journal of Clinical Endocrinology and Metabolism         | Q1      | 2.206      | 353     | 1                        |
| Neurobiology of Aging                                    | Q1      | 2.081      | 186     | 1                        |
| Human Brain Mapping                                      | Q1      | 2.005      | 191     | 3                        |
| Journal of Pain                                          | Q1      | 1.972      | 127     | 2                        |
| Progress in Cardiovascular Diseases                      | Q1      | 1.929      | 100     | 2                        |
| Thyroid                                                  | Q1      | 1.918      | 142     | 1                        |
| Liver International                                      | Q1      | 1.873      | 110     | 1                        |
| Acta Orthopaedica                                        | Q1      | 1.811      | 141     | 1                        |
| Journal of Physiology                                    | Q1      | 1.802      | 240     | 1                        |
| Cortex                                                   | Q1      | 1.786      | 115     | 1                        |
| International Journal of Obesity                         | Q1      | 1.663      | 225     | 1                        |
| Spine                                                    | Q1      | 1.657      | 254     | 1                        |
| European Radiology                                       | Q1      | 1.606      | 149     | 9                        |
| Journal of Magnetic Resonance Imaging                    | Q1      | 1.563      | 160     | 2                        |
| Obesity                                                  | Q1      | 1.438      | 199     | 2                        |
| Frontiers in Psychiatry                                  | Q1      | 1.363      | 67      | 1                        |
| Physics in Medicine and Biology                          | Q1      | 1.312      | 191     | 3                        |
| American Journal of Roentgenology                        | Q1      | 1.294      | 196     | 1                        |
| Journal of Trauma and Acute Care Surgery                 | Q1      | 1.250      | 187     | 1                        |
| Scientific Reports                                       | Q1      | 1.240      | 213     | 6                        |
| European Thyroid Journal                                 | Q1      | 1.230      | 10      | 1                        |
| Clinical Orthopaedics and Related Research               | Q1      | 1.178      | 204     | 1                        |
| Nutrition, Metabolism and Cardiovascular Diseases        | Q1      | 1.127      | 97      | 1                        |
| Behavioural Brain Research                               | Q2      | 1.113      | 171     | 1                        |
| Nutrition and Metabolism                                 | Q1      | 1.110      | 84      | 1                        |
| Calcified Tissue International                           | Q1      | 1.078      | 117     | 1                        |
| Community Dentistry and Oral Epidemiology                | Q1      | 1.061      | 101     | 1                        |
| Computerized Medical Imaging and Graphics                | Q1      | 1.033      | 76      | 2                        |
| European Journal of Radiology                            | Q1      | 1.025      | 115     | 1                        |
| IEEE Transactions on Visualization and Computer Graphics | Q1      | 1.005      | 144     | 2                        |

|                                                                  |    |       |     |   |
|------------------------------------------------------------------|----|-------|-----|---|
| PLoS ONE                                                         | Q1 | 0.990 | 332 | 9 |
| Journal of Nutrition, Health and Aging                           | Q1 | 0.987 | 82  | 1 |
| Journal of Vascular and Interventional Radiology                 | Q1 | 0.979 | 133 | 1 |
| Endocrine Connections                                            | Q2 | 0.941 | 23  | 1 |
| European Journal of Clinical Pharmacology                        | Q2 | 0.845 | 108 | 1 |
| Abdominal Radiology                                              | Q2 | 0.824 | 74  | 3 |
| Clinical Radiology                                               | Q2 | 0.778 | 90  | 2 |
| Journal of Oral and Maxillofacial Surgery                        | Q2 | 0.752 | 121 | 1 |
| Neuropsychobiology                                               | Q2 | 0.710 | 83  | 1 |
| International journal of computer assisted radiology and surgery | Q1 | 0.701 | 49  | 2 |
| Clinical Anatomy                                                 | Q2 | 0.667 | 71  | 1 |
| Magnetic Resonance Materials in Physics, Biology and Medicine    | Q2 | 0.585 | 62  | 1 |
| RöFo                                                             | Q4 | 0.219 | 48  | 1 |

**Figure S1.** Histogramm showing the number of SHIP publications by year.

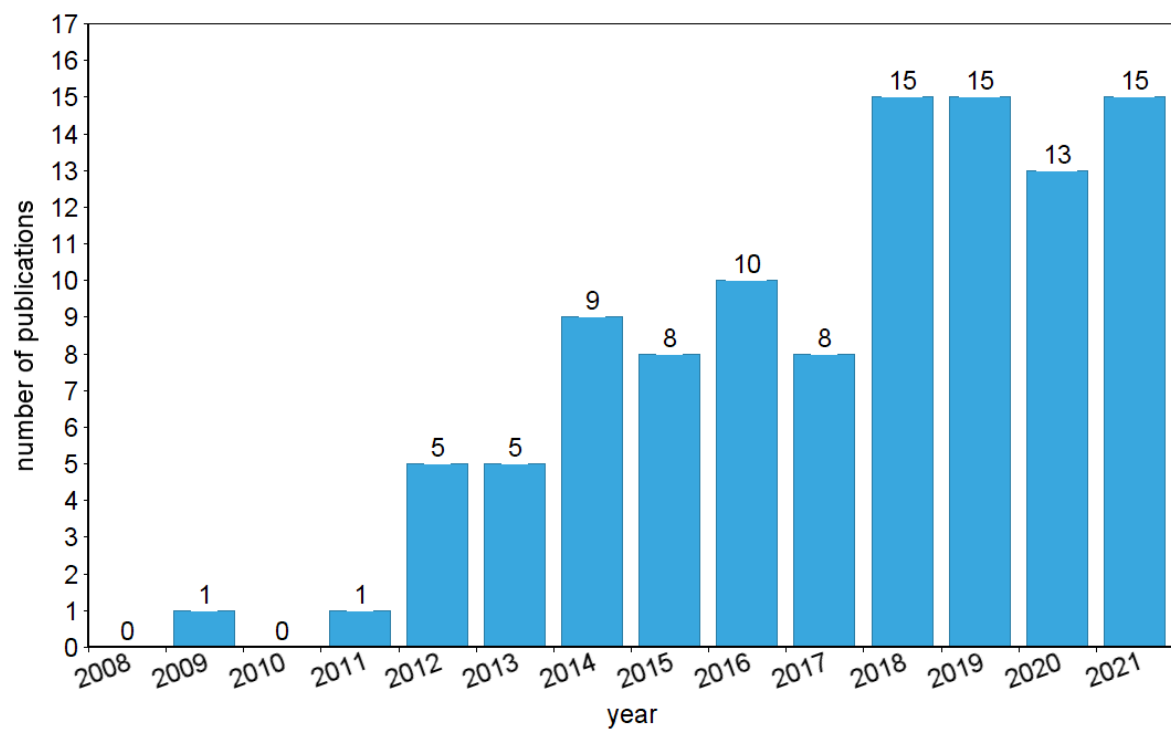

Supplement: s1 [file s1]
